# Supplementary material
Source: MDPI journal article supplement (https://www.mdpi.com/2311-5637/3/2/25)
Supplement: s1 [file s1]

**Table S1. Morphological and biochemical tests conducted for identification of bacteria**

| <b>Test</b>          | <b>Results</b> |
|----------------------|----------------|
| Simple Staining      | Rod            |
| Gram Staining        | + ve           |
| Spore Staining       | + ve           |
| Mannitol Test        | + ve           |
| Voges-Proskauer Test | + ve           |
| Catalase             | + ve           |
| Pigment              | - ve           |
| Simmons Citrate Agar | + ve           |
| Nitrate Reduction    | - ve           |
